# Supplementary material
Source: publisher figshare collection journal article supplement (https://karger.figshare.com/ndownloader/files/21933780)
Supplement: Supplementary file 1 [file 21933780]

Supplementary Online Material: Table 1

*Interview questions, main themes and participant quotes reflecting the dimensions of clinical utility across German-speaking and Chinese HPs*

| **Accuracy** | **German-speaking sample** | **Chinese sample** | **Clinical implications** |
| --- | --- | --- | --- |
| Do criteria reflect clinical cases?  *“Looking at the criteria, do the PGD criteria fit well to/describe accurately cases from your practice?”* | - - 1. **“Criteria reflect clinical symptoms”**   *“Also ich finde auf alle Fälle die ICD-11-Kriterien, so wie sie jetzt sind, sehr klar und die spiegeln meiner Meinung nach auch die Patienten wieder, die ich kenne und denen ich diese Diagnose gegeben hätte.”*-KI 014  *“I find the ICD-11 criteria, as they are now, very clear and in my opinion, they also reflect the patients I see and whom I would have assigned this diagnosis.”*–KI 014   - - 1. **“Criteria reflect normal grief response”**   *“Ich sage, ich seh dass nicht so. Ich seeh dass nicht so weil ich eben denke, dass die Punkte die hier aufgelistet sind, so lange die mich nicht komplett lahmlegen...dass die erstmal normal sind und dazugehören. ” – KI 010*  *“I don't see it that way. I don't see it that way because I think that the points listed here are normal and belong to it [to a normal grief response], as long as they are not completely shutting a person down.”*  – KI 010 | 1.10.1 **"Criteria reflect clinical symptoms"**  *“可以啊，因为里面列出的情绪和我工作过的丧亲者都是很符合的.”*-KI 006C  *“Yes, they can, as the emotions listed are very consistent with those of the bereaved people I have worked with.”*-KI 006C   - - 1. **"Missing symptoms"**   *“在情绪痛苦的部分大体上都适用，尤其是悲伤、内疚或愤怒很容易见到，可以持续十年，甚至数十年之久。不过，我所接触的个案通常也会有明显抑郁情绪，异常的有保留遗物的状况，睡眠障碍以及生理反应.”*-KI 003C  *“Most of the emotional pain items are applicable, especially the sadness, guilt and anger, which are very common and may last for over ten years. However, my bereaved cases also have significant depressive symptoms, abnormal behavior of keeping the belongings of the deceased, insomnia and physical symptoms.”*-KI 003C | - Criteria reflect what HPs see in clinical practice - Phenomenological similarity normal and prolonged grief - Criteria need to be modified to include additional symptoms |
| Do criteria differentiate between normal and prolonged grief?  *“In general, do these criteria help to differentiate abnormal grief from normal grief?”* | **1.9.1 “Criteria differentiate”**  *“Also, wenn wir auf die Hauptsymptome gehen … dass man diese innere Verbundenheit nicht herkriegt, dass das Verlangen immer ungestillt bleibt, und dass die Todesgeschichte wichtiger ist als der Verstorbene und die Geschichte, die man mit ihm hatte. Und wenn man das als kriterium nimmt, dann glaube ich, kann man das unterscheiden.” – KI 005*  *“So, if we look at the main symptoms ... that you don't get this inner connection [with the deceased], that the desire always remains unfulfilled, and that the death story is more important than the deceased and the story one had with him. And if you take this as a criterion, then I think you are able to distinguish.” – KI 005*  **1.9.2 “Criteria differentiate with qualifiers (time criterion, symptom intensity, hallmark symptoms, contextual factors, number of accessory symptoms is specified, additional symptoms added)”**  *“Ich denke in Anbetracht der Zeit schon.“*-KI 003  *“Considering the time, I would say ‘Yes’.”*–KI 003  **1.9.3 “Criteria do not differentiate since same symptoms as in normal grief”**  *“Nein, das glaube ich nicht, weil die Symptome einer normalen, einer sogenannten normalen Trauerreaktion in den ersten Monaten sich überhaupt nicht unterscheiden zu den Symptomen einer anhaltenden.”*-KI 013  *“No, I don't think so, because the symptoms of a so-called normal grief reaction in the first few months do not differ at all from the symptoms of a prolonged grief reaction.”*–KI 013 | **1.9.1 “Criteria differentiate”**  *“会有帮助。就比如说难以接受死亡和没有办法感受到正面的情绪，就这种。可能有问题的，或者说病理性的，就是无论何种情况下都很难，或者情感麻木等等，所以我觉得还是比较有针对性.”*-KI 007C  *“Yes, very helpful. Some people cannot accept death or experience positive feelings. Some people with disordered or problematic grief have great difficulties in these areas, so I think these items are relevant.”*-KI 007C  **1.9.2 “Criteria differentiate with qualifiers (time criterion, symptom intensity, hallmark symptoms, contextual factors, number of accessory symptoms is specified, additional symptoms added)”**  *“然后我觉得两部分，大部分是哀伤的表现。这是一个，完了就是他反应的强度，我们表现有然后反应的强度，来判断他，还有时间的长短.”-KI 009C*  *“Several aspects: first, grief reactions, then severity of these reactions, and then duration”. -KI 009C*  **1.9.3 “Weird to use symptoms to differentiate, functional impairment is valuable.”**  *“如果按照这个症状来区分正常和病理，我会觉得很奇怪。因为这所有的症状在我看来，如果是在一定的时间内，很正常，每个人都会是这样。这个不是，这些症状不是说区分正常病理，这个症状是哀伤者比较常见的症状，在我看来。其实我发现，这些标准它是一个症状处，其实真正特别有价值的是啥？真正有价值的是功能受损标准，其实这些症状大家都有，但是未必是你有了这些症状之后，你还有没有自己的生活。你除了活在悲伤里，你还有没有其他.”*-KI 001C  *“I think it is weird to differentiate normal and abnormal grief based on the symptoms, as all the symptoms are normal for all bereaved people. These symptoms are normal reactions for bereaved people. For me, the real valuable criterion is functional impairment. All bereaved people may have these symptoms, but a few people don’t have their life anymore, they only have their grief.”*-KI 001C  **1.9.4 “There are cultural differences regarding the understanding of normal and disordered grief”**  *“但这里面就刚才我觉得有几个可能是文化的方面。就是中西方对正常和不正常的理解是有差异的.”*-KI 009C  *“I think there might be some cultural aspects. Chinese people have a different understanding about normal and abnormal.”*-KI 009C | - Criteria distinguish between normal and prolonged grief after adaptations - Focus on functional impairment in differentiation from normal grief - Cultural variations in understanding of grief responses |
|  | **1.11.1 “Criteria distinguish”**  *“Denke ich schon, weil ja so die Kernsymptome einer Depression fast nicht mehr vorkommen. Das ist ja sehr Trauerspezifisch.”*-KI 005  *“I think yes, because the core symptoms of depression are not part of the criteria – it is very grief specific.”*–KI 005  **1.11.2 “Criteria distinguish if specified (e.g., time criterion, define symptoms, exclusion criteria)**  “*Ich finde es gibt Teile, wo sich das vermischt und wo man das besser unterscheiden müsste. Das gibts manchmal auch im ICD-10. Differenzierungskriterien.”-* KI 002  *“I think there are parts where it blends and where a more fine-grained distinction is necessary. This [differentiation criteria] is sometimes also found in the ICD-10.”–* KI 002  **1.11.3 “Criteria do not distinguish”**  *“Ich denke das reicht nicht aus, es kann ein Hinweis sein, aber sie wissen so gut wie ich da gibt es soviele Formen.”-*KI 003  *“I don't think that's enough - it can be a clue, but you know as well as I do that there are so many different manifestations [of disorders].”–KI 003* | **1.11.1 “Criteria distinguish”**  *“与抑郁症：看到这个标准就是跟抑郁症就评不一样，就是比如说 我看一下，就比如说那个,愤怒责备这种，就是感觉比较强烈的情绪。PTSD：我会觉得就是可能在这个标准中看不出来，但是就比如说第二点说以下至少符合一条对死者持续的渴望和沉浸在跟他相关的感受当中，那这个可能PTSD就可以区分它和PTSD”*-KI 007C  *“Compared to depression, the criteria of PGD differ significantly (e.g., anger and blame). Besides, longing and preoccupation can differentiate PGD and PTSD”*–KI 007C  **1.11.2 “Traumatic grief is difficult to differentiate from PTSD”**  *“由于有一种亲爱的人死于创伤性事件，容易造成创伤性哀伤。创伤性哀伤与PTSD难以区分。”-KI 003C*  *“Some death is caused by traumatic events and may lead to traumatic grief. It will be difficult to differentiate between traumatic grief and PTSD”*-KI003C | - Criteria distinguish between prolonged grief and other mental health disorders after adaptations - Difficulties distinguishing subforms of prolonged grief and mental health disorders |
|  |  |  |  |
| **Ease of use and implementation** | **German-speaking Sample** | **Chinese Sample** | **Clinical Implications** |
| Merits of introducing a grief disorder  *“What is the merit of introducing a new disorder to German-speaking Swiss/Chinese clinical culture?”* | **1.3.1 “Correct diagnosis vs. misdiagnosis”**  *“Weil ich Patienten sehe, die meiner Meinung nach dieses Kriterienbild erfüllen und die momentan eben fehlklassifiziert werden und deswegen auch eine falsche Therapie erhalten.” – KI 014*  *“Because I see patients which, in my opinion, meet these criteria and who are currently misclassified and therefore receive the wrong therapy.” – KI 014*  **1.3.2 “Insurance-related benefits and work benefits”**  *“…Dann könnten wir es auch abrechnen, das können wir im Moment nicht - wir müssen andere Gründe angeben, um das abrechnen zu können, wenn wir das wollen.”*-KI 007  *“Then we could also have it covered through insurance, which is not the case at the moment - we have to give another diagnosis than PGD to bill it if we want to.”*-KI 007  **1.3.3 “Reduced stigma vs. other mental disorders”**  *“Ja. Aber es gibt auch eine Gefahr, die ich darin sehe. Oft wehren sich die Patienten zuzugeben dass sie depressiv werden und dass das jetzt nicht mehr eine normale Trauer ist, sondern da ist schon was … "Gestörtes". Und bei einer komplizierten Trauerreaktion könnten sie, glaube ich, das umgehen.” - KI 002*  *“Yes. But there's also a danger in it. Patients often refuse to admit that they become depressed and that it is no longer normal grief, but there is already something ... "disturbed". And I believe that in the case of a complicated grief reaction they could get around it.”-KI 002*  **1.3.4 “Facilitates communication between HPs”**  *“Für die Kommunikation zwischen Fachleuten kann das [die Diagnose] ein Vorteil sein.” – KI 013*  *“This [the diagnosis] can be an advantage for the communication between experts.” – KI 013*  **1.3.5 “Clinical framework for guidance/orientation”**  *“Tatsächlich kann es helfen Dinge zu ordnen oder einzuordnen. ”. – KI 001*  *“In fact, it can help to order or classify things.” – KI 001*  **1.3.5 “Promotes interventions, treatment”**  *“Weil ich Patienten sehe, die meiner Meinung nach dieses Kriterienbild erfüllen und die momentan eben fehlklassifiziert werden und deswegen auch eine falsche Therapie erhalten…Deswegen denke ich, dass durch eine spezifische Diagnose den Menschen besser geholfen werden könnte. …z.B. dann auch trauerspezifische Therapien angeboten werden können.” – KI 014.*  *“Because I see patients who, in my opinion, meet these criteria and who are currently misclassified and therefore receive the wrong therapy... This is the reason why I think that with a specific diagnosis people could receive better help. ...e.g. grief specific therapies can be offered.”  – KI 014*  **1.3.6 “Research advantages”**  *“Dass die Patientengruppe endlich wahrgenommen wird. Weil man jetzt gute Arbeit damit machen kann, weil man jetzt auch Studien miteinander vergleichen kann [...] Weil man jetzt sagen kann: Diese Ergebnisse passen für alle Patienten nach ICD-11-Kriterien PGD. […] Also ich fand, es war auch schwieriger, die Forschung einzuordnen und ich habe die Hoffnung, dass eben mit den Kriterien einfach der Wissenszuwachs auch schneller werden wird.” – KI 014*  *“That this patient group is finally receiving attention. Because now you can do good [research] work, and you can also compare studies with each other [...] Because you can now say: These results fit all patients according to ICD-11 PGD criteria . [...] Well, I found that it was also more difficult to assess the research and I have the hope that the criteria will simply promote an increase in knowledge.”–KI 014*  **1.3.7 “Public awareness and acceptance of grief”**  *“Vorteilhaft würde ich finde, dass man dem Thema Trauer wirklich Beachtung schenkt, dass man sie ernst nimmt und dass man sich bewusst ist, dass das ein Prozess ist, eben in dem Sinn gut verlaufen kann oder sich in eine Krankheit entwickeln kann.”-KI 006*  *“I think it would be advantageous to pay attention to the subject of grief, to take it seriously and to create an awareness that this is a process which can go well or can develop into a disorder.”-KI 006*  **1.3.8 “Acknowledgement for patient”**  *“Positiv ist sozusagen, wenn man den Eindruck hat [...] dass es dieser Person wirklich nicht gut geht oder dass sie wirklich nicht über den Tod hinweg ist von ihrem Angehörigen, dass man dann später sagen kann, das ist eine anhaltenden Trauerstörung.” – KI 013*  *"Positive is, so to speak, when you have the impression [...] that a person is really not well or really not over the death of a loved one, that you can later say that this is prolonged grief disorder.”–KI 013*  **1.3.9 “No advantages”**  *“Für die Trauernden ist es mir relativ schleierhaft [was für ein Vorteils es bringt], ob jetzt so eine Diagnose kommt oder nicht. Wenn jemand extrem belastet ist durch einen Trauerfall, dann ist die Komorbidität mit anderen Störungen so gross, dass man leicht auf eine andere Störung, also das die Kriterien meistens auch für eine andere Störung genügen.” – KI 013*  *“It is relatively unclear to me [what the merit could be] for the mourners. If someone is extremely impacted by the death, then the co-morbidity with other disorders will be so large that [...] the criteria are usually also given for another disorder.”–KI 013* | **1.3.1 “Correct diagnosis vs. misdiagnosis”**  *“对工作人员：至少对我来说，我觉得这样子的定义或者是明确的一个评量的一个标准，我觉得比较不会有个人性主观上感受上的分别。是，我认为他可能才会非常明确地，面对到这样一个状况的人.”*-KI 010C  *“At least for me, this definition is a clear assessment criterion, and there won’t be personal or subjective feelings involved. I think this will make the situation clearer when we have such a [PGD] patient”*-KI 010C  **1.3.2 “Promotes intervention, treatment”**  *“他们需要有这样一个标准去评判他。比如说像丧亲这件事情之后，他走到了哪个阶段，我们需要根据他目前所处的这个阶段，给他相应的这种干预方式.”*-KI 008C  *“They [practitioners] need such a criterion to assess a bereaved person and give him/her the relevant intervention.”*-KI 008C  **1.3.3 “Facilitates research and professional communication”**  *“要延长哀伤障碍，能够被label出来，才会有更多的关于他的病理学或者治疗学的这种研究，或者是发现去做。对研究者来说，它是一个很大的促进的动力.”*-KI 002C  *PGD need to be labeled first, and more pathological or intervention studies may arise. For researchers, it is a great promoter.”*-KI 002C  **1.3.4 “Increases awareness among bereaved and get timely support”**  *“对丧亲者来说的话益处的话，我觉得如果说能被及时发现有这方面的问题的话，可能更多的得到医生或者社会支持系统的关注和支持.”*-KI 004C  *“The bereaved can notice their problem earlier, and get more attention and support from doctors and their social support system.”*–KI 004C  **1.3.5 “Promotes understanding about grief”**  *“好处的话我觉得它可能会能够更加认清，提高认知度，就能够很好地去理解哀伤，当然能够理解到哀伤，比如说他目前的状态是正常的，或者说他目前已经不正常了.”*-KI 008C  *“This can increase their knowledge about grief, help people understand grief more, and know whether their grief is normal or abnormal.”*-KI 008C | - HP, patient, societal, care/ treatment and research benefits of new diagnostic classification |
| Demerits of introducing a grief disorder  *“What is the demerit of introducing a new disorder to German-speaking Swiss/Chinese clinical culture?”* | **1.4.1 “Pathologizing grief”**  *“Ja, ja, weil ich nicht möchte das eine normale gesunde Trauerreaktion pathalogisiert wird. Es ist für mich auch die Gefahr, dass man sagt Trauer ist eine Krankheit.“-KI 004*  *“Yeah, yeah, because I don't want a normal healthy grief reaction to be pathologized. For me it's also a danger that people say grief is a disease.”-KI 004*  **1.4.2 “Loss of individuality of grief”**  *“Weil eine anhaltende Trauerstörung so etwas Individuelles ist. Also meiner Meinung nach ist Trauer etwas Individuelles und man kann die Erfahrungen, die ich gemacht habe, nicht schubladisieren.” - KI 008*  *“Because prolonged grief disorder is so individual. So, in my opinion, grief is something totally individual and you can't put the experiences into boxes.”– KI 008*  **1.4.3 “Stigmatization”**  *“Und natürlich ist es schon so, dass es auch stigmatisierend sein kann. Aber ich denke, dass das leider bei allen psychischen Diagnosen der Fall ist, dass das jetzt nicht spezifisch für die anhaltende Trauerstörung ist.” -KI 014*  *“And, of course, it can also be stigmatizing. But I think that this is unfortunately the case with all psychological diagnoses, it is not specific for prolonged grief disorder.”- KI 014*  **1.4.4 “Premature diagnosis”**  *“Also ich glaube, dass es einerseits zu schnellen Diagnosen kommen könnte, gerade wenn diese Diagnosen gestellt werden von Personen, die sich im Trauerbereich nicht so gut auskennen.”-KI 014*  *“So I think that […]  this could lead to premature diagnoses, especially if these diagnoses are made by people who are not so familiar with grief.”-KI 014*  **1.4.5 “Fast diagnosis, impersonal relationship with patient”**  *“Sie haben den Nachteil, dass man sich sozusagen den Umweg über eine Beziehung, eine Beziehungsaufnahme, Beziehungsaufbau erspart. Also das ist in unserer Zeit, oder man es sich ersparen will. In unserer Zeit, in der alles sehr schnell geht, auch in der Klinik, in den Spitälern, ist das manchmal wichtig und gut aber es hat den Nachteil, dass relativ unpersönlich Eventuelle eingeordnet und zugeordnet werden.” - KI 001*  *“They have the disadvantage that it may eliminate a relationship, a relationship building or development … it has the disadvantage that the assessment is relatively impersonal.”–KI 007*  **1.4.6 “Lack of experience, skills, reflection from HPs”**  *“Ich sage jetzt einmal, die Reife für solche Diagnosen und die Reflexion für solche Diagnosen, nicht wirklich vorhanden ist.” – KI 007*  *“Let’s say that the maturity and the reflection for such diagnoses is not really present.”–KI 007*  **1.4.7 “Arbitrary interpretation of criteria”**  *“da kommt noch das vage, aber das ist mit dem DSM5 genau gleich, das keine kulturellen oder gesellschaftlichen Normen verletzt werden sollten. Das kann man jetzt positiv oder negativ sehen. Negativ öffnet es der Willkür Tür und Tor.” – KI 013*  *“it is vague, but that’s exactly the same with the DSM5, where cultural or social norms should not be violated. This can be seen positively or negatively. Negatively it opens the door to arbitrariness.”– KI 013*  **1.4.8 “Criteria are erroneous”**  *“ich finde diese Diagnose tatsächlich irreleitend, wie sie im Moment ist.” – KI 005*  *“I actually find this diagnosis, as it is right now, misleading.”–KI 005*  **1.4.9 “No disadvantages**  *“I: Okay. Sehen sie irgendwelche speziellen Nachteile*  *B: ... Nein sehe ich nicht” - KI 013*  *“No, I don’t [see any disadvantages].”– KI 013* | **1.4.1 “Overdiagnosis or enlarge diagnosis”**  *“可能会有诊断扩大化的趋势，一些过度的医疗可能会有这个方面的可能.”*-KI 004C  *“This may increase the diagnosis and lead to overtreatment.”*–KI 004C  **1.4.2 “Wrong diagnosis harmful for the bereaved”**  *“诊断标准必须由训练有素的专业人员使用，否则若外流被引用在通俗心理学书籍，可能导致丧亲者的伤害.”*-KI 004C  *“These diagnostic criteria need to be used by trained professionals. Otherwise, they may lead to harm for the bereaved.”*-KI 004C  **1.4.3 “Stigmatization”**  *“这个丧亲的父母的咨询来看，不好的地方是在于他们特别害怕stigma(耻辱，污名化)，如果他知道有一种病叫做复杂哀伤和延长哀伤障碍的话，他很容易就对号入座.”-*KI 002C  *“According to my experience of working with bereaved parents, some of the parents are afraid of being stigmatized. If they know there is a disease called complicated grief or prolonged grief disorder, it will be very easy for them to think that they have such a disease.”* -KI 002C  **1.4.4 “Benefits from the disease for the bereaved”**  *“对，就是像有一些障碍，比如说心理障碍，他们可能是因为这些障碍让他获得了关怀，让他得到了更多的关注，这个关注或者关怀对他来说是非常需要的。他可以让自己不好起来，但是这种不好起来也是潜意识的，就是他。虽然表面上是没有控制他要好起来，但他潜意识中就是要不好起来才能获得更多的爱，尤其像青少年的.”*-KI 008C  *“Just like some other disorders, the patient may get attention for being diagnosed with some disorder, and this attention is very important for him/her. He/she may want to stay in the disordered state unconsciously in order to get more support/love, especially for adolescents.”* -KI 008C | HP, patient, societal, and care/ treatment demerits of new diagnostic classification |
| What are the barriers of implementation into practice?  *e.g., “Do you perceive any barriers to implementing the diagnosis into your practice?”, “Would it be difficult in practice to assess to what extent the grief reaction exceeds the expected social, cultural, or religious norms? (If yes, why?)”* | **1.15.1 “Criteria specific barriers”**  *“Also erstmal glaube ich, die 6 Monate - aus meiner Praxis ist der Zeitraum zu kurz.” – KI 005*  *“Well, I think the 6 months period is too short based on what I see in my practice.”–KI 005*  **1.15.2 “HP specific barriers” (inexperience of HPs, lack of grief education, lack of knowledge about patient culture)**  *“Nicht schwieriger aber ich denke Diagnosen zu stellen gefährlicher, weil du ja eben, wir kennen andere Religionen kaum, welche Gebote da mit eine Rolle spielen und wie weit man gezwungen ist diese Trauer auszuleben, egal wie es in einem Drinnen aussieht.”-*KI 003  *“Not more difficult but I think diagnosing is more dangerous, because you know, we hardly know other religions, which norms exist and how you should grieve, no matter what it looks like on the inside.”–KI 003*  **1.15.3 “No barriers”**  *“I: Sehen Sie mögliche Schwierigkeiten, die Diagnose aufzunehmen in die tägliche Praxis?*  *B: Nein.” - KI 12*  *“I: Do you see any difficulties in incorporating the diagnosis into your daily practice?*  *B: No.” – KI 12* | **1.15.1 “Cultural factors”**  *“因为中国也受咱们儒家文化思想的这种传承，好像人去世也好，他可能更多的是一种缅怀，不会把自己这种痛苦觉得是一种心理状态的一种痛苦，他觉得是对亲人的一种思念，或者说我痛苦得越深，说明我对这个人的怀念更深，或者说越不舍，不会去把它想象成一种觉得好像是我有问题这样子.”*-KI 005C  *“Chinese people are influenced by Confucian culture and they may see grief as a way of mourning rather than a painful psychological status. They may think that deeper pain means more yearning and love for the deceased, and don’t view it as a psychological problem.”*-KI 005C  **1.15.2 “Unfamiliar with PGD, the new criteria or ICD”**  *”可能就是因为毕竟这个新的标准刚出来被大家接受，可能还是要有一个适应跟习惯的时间，如果说大家都还不太明确这个诊断的含义和好处的话，可能刚开始会觉得被扣上帽子，可能会觉得心里面可能比较有抵触，可能是这样的.”*-KI 004C  *“As this disorder is so new, people need time to get to know it. If people are not familiar with this disorder and don’t know its meaning and benefits, some people who get such a diagnosis may feel being labeled and have mixed feelings.”*-KI 004C  **1.15.3 “Death is a heavy topic, which may lead to avoidance in therapy”**  *“当然我觉得大家可能总体来讲对死亡还是比较回避的。其实来访者是抛出来了，但是他们显得漫不经心，或者即使明确提出来，就是，但对咨询师治疗师来讲，还是人们都有死亡恐惧怎么说，别人的死亡也不太敢碰。因为痛苦确实就比较大。比如说他们一个人讲睡不好觉，咱们简单来讲，睡不好觉。这个作为一个，比如我从实务咨询治疗角度来讲， 如果我们只把它分成焦虑和抑郁，我们就怎么焦虑症怎么治，抑郁症怎么治。 但是可能他把他亲人去世就给忽略掉，即使那个来访者或者病人，他在报告当中，主述当中他提了，但是他可能只盯情绪，他不会盯死亡，这个丧亲”*-KI 009C  *“People may avoid topics about death. Sometimes the clients mentioned it in a casual way. Sometimes, although they mentioned death clearly, the counselors are afraid of addressing it. The pain caused by death can be huge. For example, the counselors can treat patients with depression or anxiety, but they may ignore the patients’ loved ones’ death. Although the patients mentioned this, some counselors may only focus on emotions rather than the death itself.”-*KI 009C  **1.15.4 “Don’t want to judge, diagnose, or label the bereaved”**  *“我可能我在做这个我不会去把这个标签化， 因为标签化，对我而言，标签当我去下这个标签的时候，其实是一种评判了。”-KI 004C*  *“For me (a social worker), I don’t want to label my clients. When I label them, I judge them.”-KI 005C*  **1.15.5 “No barriers”**  *“应该没有吧，这个评估是非常直接，非常好用的.”*-KI 006C  *“No barriers. This guideline is very straightforward, easy to use.”*-KI 006C | - HP, patient, operational and cultural/societal barriers |
| Clarity of diagnostic criteria  e.g., *“Do you find the discrete symptoms appropriate?”, “Do you find the impairment criterion appropriate?”* | **1.6.1 “Context needed”**  *“Was ich auch noch als, ich sage einmal Rahmenfaktoren, die die Trauer sehr beeinflussen, aufgeschrieben habe ist natürlich junges Alter. Also wenn die Person, die stirbt, sehr jung ist. Ein Massentrauma, was ich vorhin erwähnt habe. Extreme Sterbemomente [ …] Uns hat mal eine Tochter, die ihren Vater zu Hause gepflegt hat gesagt, er sei schreiend in ihren Armen gestorben. Das sind Situationen, die schlecht zu betrauern sind.” - KI 011*  *“What I have also written down as, I call them situational factors that greatly impact grief is, of course, young age. So when the person who dies is very young. A mass trauma, which I mentioned earlier. Extreme circumstances surrounding death [...] A daughter who cared for her father at home once told us that he died screaming in her arms. These are situations that make grief more difficult.”–KI 011*  **1.6.2 “Vaguely phrased features – definitions needed”**  *“Viele Begriffe waren mir nicht klar genug definiert.”- KI 011*  *“Many terms were not defined clearly enough for me.” - KI 011*  **1.6.3 “Create symptom clusters”**  *“Es ist sehr unspezifisch und vage, ich finde oder da müsste man jetzt unterscheiden oder Unterkategorien machen, es gibt so Unterkategorien von normalem Tod oder Unterkategorie Tod nach langer Krankheit. Unterkategorie Suizid und dann machen diese Kriterien auch wieder völlig eine andere Bedeutung.”-KI 002*  *“It [the diagnostic criteria]is very unspecific and vague. I think one should now differentiate or make subcategories. A subcategory for normal death, death after a long illness, or suicide and then these criteria have a completely different meaning for each subcategory.”–KI 002*  **1.6.4 “Determine number of accessory symptoms”**  *“Also ich würde mir natürlich wünschen, dass man da eine Angabe macht, wie viele davon mindestens gegeben sein müssen. Also z.B. Mindestens 3 oder 4. Und am liebsten hätte ich halt natürlich etwas, wo diese Zahl, wie viele erfüllt sein müssen, auch abgesichert ist. Also dass das nicht aus meinem Bauchgefühl heraus erfolgt, ob das jetzt 3 oder 4 sein sollten, sondern dass man das einmal empirisch anschaut*.”-KI 014  *“So I wish one would know how many of them [symptoms] must be given at least - e.g. at least 3 or 4. And that this is not done based on my gut feeling […]but that you look at it empirically.”-KI 014* |  | - Feature specific suggestions to improve clinical utility |
